# Supplementary material
Source: publisher figshare collection journal article supplement (https://karger.figshare.com/ndownloader/files/8705065)
Supplement: Supplementary file 1 [file 8705065]

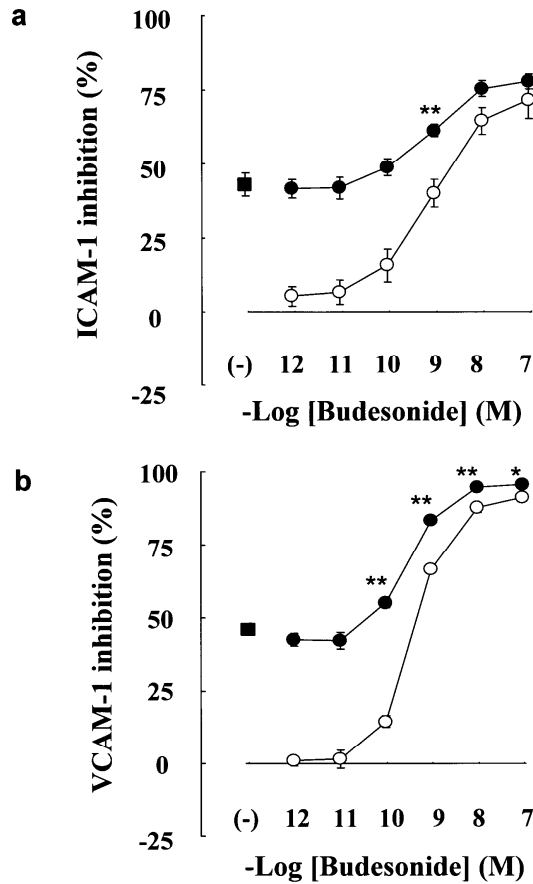

**Online Supplement Fig. 1.** Concentration-inhibitory curve of budesonide in the absence or presence of  $1 \times 10^{-9}$  M procaterol on ICAM-1 (a) and VCAM-1 (b) expression in normal human lung fibroblasts (NHLF). NHLF were stimulated with 1 ng/mL TNF- $\alpha$ . Results were normalized to obtain the percentages of inhibition and are shown as the mean  $\pm$  S.E. obtained from 6 experiments performed in triplicate. Filled circles (●) = budesonide in the presence of  $10^{-9}$  M procaterol; open circles (○) = budesonide alone; Filled squares (■) =  $10^{-9}$  M procaterol alone. The between-group differences for the combination of procaterol and budesonide, and procaterol or budesonide alone were analyzed for each budesonide concentration by Dunnett's test (two-tailed). \*:  $P < 0.05$  and \*\*:  $P < 0.01$  compared with the inhibition by each drug alone (additive effect).
